# Supplementary material for: Reaction temperature variations on the crystallographic state of spinel cobalt aluminate
Source: Royal Society of Chemistry journal article supplement (doi:10.1039/c3dt32828g), 2013-01-01
Supplement: c3dt32828g.pdf [file c3dt32828g.pdf]

**Electronic Supplementary Information Available for “Reaction temperature variations on the crystallographic state of spinel cobalt aluminate”**

*Minori Taguchi,<sup>1,2\*</sup> Takayuki Nakane,<sup>2</sup> Kenjiro Hashi,<sup>2</sup> Shinobu Ohki,<sup>2</sup>*

*Tadashi Shimizu,<sup>2</sup> Yoshio Sakka,<sup>2</sup> Akiyuki Matsushita,<sup>2</sup> Hiroya Abe,<sup>3</sup>*

*Toshitaka Funazukuri<sup>1</sup> and Takashi Naka<sup>2</sup>*

<sup>1</sup>Department of Applied Chemistry, Faculty of Science and Engineering,  
Chuo University,

1-13-27 Kasuga, Bunkyo-ku, Tokyo 112-8551, Japan

<sup>2</sup>National Institute for Materials Science,

1-2-1 Sengen, Tsukuba 305-0047, Japan

<sup>3</sup>Joining and Welding Research Institute, Osaka University,

11-1 Mihogaoka, Ibaraki, Osaka 567-0047, Japan

### Supplementary Figures

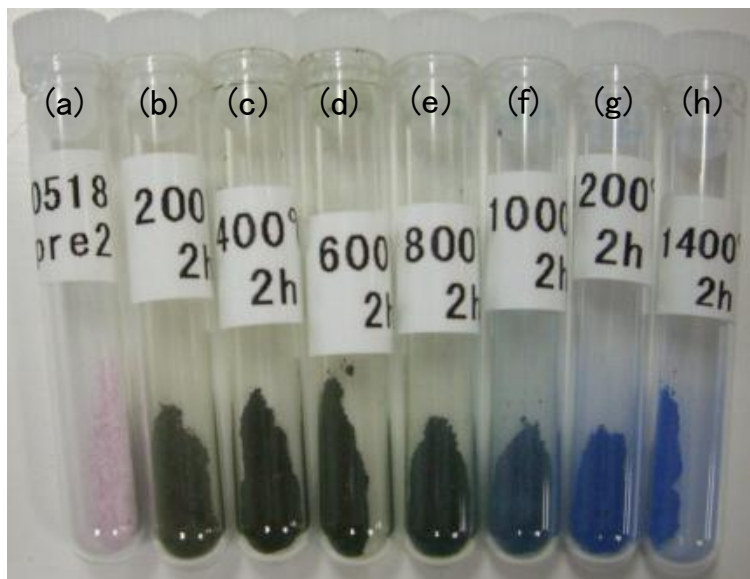

Figure S1. Photograph of (a) precursor, (b) products sintered at 200 °C, (c) 400 °C, (d) 600 °C, (e) 800 °C, (f) 1000 °C, (g) 1200 °C, and (h) 1400 °C.

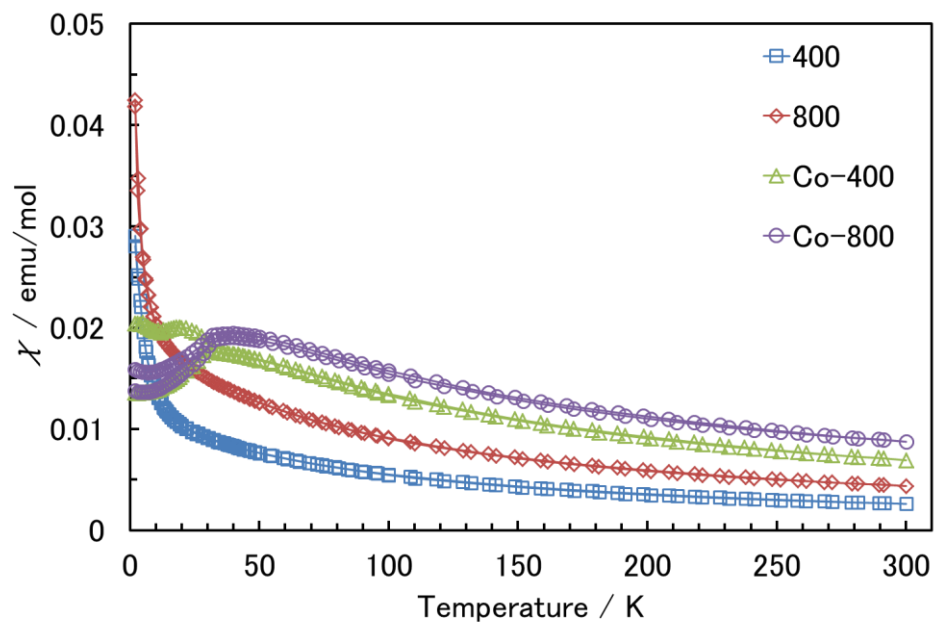

Figure S2. Zero-field-cooled and field-cooled magnetic susceptibility ( $\chi$ ) versus temperature ( $T$ ) plots measured at 100 Oe of the products synthesized from Co-Al hydroxide precursor sintered at 400 (**400**) and 800 °C (**800**), and the  $\text{Co}_3\text{O}_4$  products synthesized from  $\text{Co}(\text{OH})_2$  sintered at 400 (**Co-400**) and 800 °C (**Co-800**), respectively.

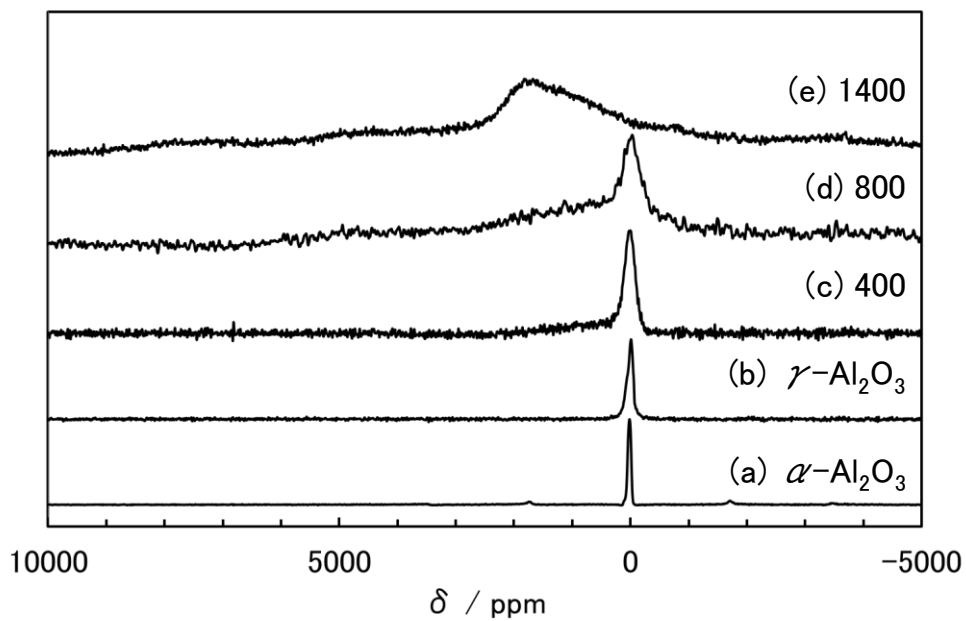

Figure S3.  $^{27}\text{Al}$  wide-band NMR spectra of reference compounds: (a)  $\alpha\text{-Al}_2\text{O}_3$ , (b)  $\gamma\text{-Al}_2\text{O}_3$ , and (c) products sintered at 400 °C, (**400**), (d) 800 °C, (**800**), and (e) 1400 °C, (**1400**).
